# Supplementary material for: Designed peptide-grafted hydrogels for human pluripotent stem cell culture and differentiation
Source: Royal Society of Chemistry journal article supplement (doi:10.1039/d2tb02521c), 2022-12-07
Supplement: d2tb02521c1.pdf [file d2tb02521c1.pdf]

## Designed peptide-grafted hydrogels for human pluripotent stem cell culture and differentiation

Ting Wang,<sup>‡a</sup> Qian Liu,<sup>‡a</sup> Yu-Tang Chang,<sup>‡b</sup> Jun Liu,<sup>a</sup> Tao Yu,<sup>a</sup> Kailibinuer Maitiruze,<sup>a</sup> Lee-Kiat Ban,<sup>c</sup> Tzu-Cheng Sung,<sup>a</sup> Suresh Kumar Subbiah,<sup>d</sup> Remya Rajan Renuka,<sup>d</sup> Shih Hsi Jen,<sup>e</sup> Henry Hsin-Chung Lee<sup>\*\*c,f,g</sup> and Akon Higuchi<sup>\*a,b,h</sup>

<sup>a</sup>School of Ophthalmology and Optometry, Eye Hospital, Wenzhou Medical University, No. 270, Xueyuan Road, Wenzhou, Zhejiang, 325027, China

<sup>b</sup>Department of Chemical and Materials Engineering, National Central University, No. 300, Jhongda RD., Jhongli, Taoyuan 32001, Taiwan

<sup>c</sup>Department of Surgery, Hsinchu Cathay General Hospital, No. 678, Sec 2, Zhonghua Rd., Hsinchu, 30060, Taiwan

<sup>d</sup>Centre for Materials Engineering and Regenerative Medicine, Bharath Institute of Higher Education and Research, 173, Agaram Road, Tambaram East, Chennai-73, 600078, India

<sup>e</sup>Department of Obstetrics and Gynecology, Taiwan Landseed Hospital, 77, Kuangtai Road, Pingjen City, Taoyuan 32405, Taiwan

<sup>f</sup>Department of Surgery, Cathay General Hospital, Taipei 10630, Taiwan

<sup>g</sup>Graduate Institute of Translational and Interdisciplinary Medicine, National Central University, No. 300, Jhongda Rd., Jhongli, Taoyuan, 32001, Taiwan

<sup>h</sup>R&D Center for Membrane Technology, Chung Yuan Christian University, Chungli, Taoyuan 320, Taiwan

\* Correspondence author. Department of Chemical and Materials Engineering, National Central University, No. 300, Jhongda RD., Jhongli, Taoyuan 32001, Taiwan & School of Ophthalmology and Optometry, Eye Hospital, Wenzhou Medical University, No. 270, Xueyuan Road, Wenzhou, Zhejiang, 325027, China

Tel.: +86 577-88068822; fax: +86 086-577-88832083.

E-mail address: [higuchi@ncu.edu.tw](mailto:higuchi@ncu.edu.tw); [higuchi@wmu.edu.cn](mailto:higuchi@wmu.edu.cn) (A. Higuchi)

\*\* Correspondence author. Department of Surgery, Hsinchu Cathay General Hospital, No. 678, Sec 2, Zhonghua Rd., Hsinchu, 30060, Taiwan,

E-mail address: [hhc.lee@cgh.org.tw](mailto:hhc.lee@cgh.org.tw) (J.H. Lee)

<sup>‡</sup> These authors contributed equally to this work.

## Supplementary Information

**Supplementary Table 1** Materials used in this study.

| Materials                                                                      | Abbreviation                             | Catalog No. | Company                                             |
|--------------------------------------------------------------------------------|------------------------------------------|-------------|-----------------------------------------------------|
| <b>ECM</b>                                                                     |                                          |             |                                                     |
| Matrigel                                                                       | MAT                                      | 356230      | Corning (Corning, NY, USA)                          |
| Recombinant vitronectin                                                        | rVTN                                     | A14700      | Thermo Fisher Scientific Inc. (Waltham, MA, USA)    |
| <b>Cell culture dishes</b>                                                     |                                          |             |                                                     |
| 6-well polystyrene plate                                                       | TCP                                      | #353046     | Corning (Corning, NY, USA)                          |
| <b>Chemicals</b>                                                               |                                          |             |                                                     |
| N-(3-dimethylaminopropyl)-N'-ethylcarbodiimide hydrochloride                   | EDC                                      | E7750       | Sigma-Aldrich (St. Louis, MO, USA)                  |
| N-Hydroxysuccinimide                                                           | NHS                                      | 56480       | Sigma-Aldrich (St. Louis, MO, USA)                  |
| Dispase II                                                                     | Dispase                                  | D4693-1G    | Sigma-Aldrich (St. Louis, MO, USA)                  |
| Trypsin-EDTA (0.25%)                                                           | Trypsin-EDTA                             | 25200072    | Thermo Fisher Scientific Inc. (Waltham, MA, USA)    |
| Bone morphogenic protein 4                                                     | BMP4                                     | H4916       | Sigma-Aldrich (St. Louis, MO, USA)                  |
| 3-(6-Methyl-2-pyridinyl)-N-phenyl-4-(4-quinoliny)-1H-pyrazole-1-carbothioamide | A83-01                                   | SML0788     | Sigma-Aldrich (St. Louis, MO, USA)                  |
| β-glycerophosphate                                                             | β-GP                                     | G9422-10G   | Sigma-Aldrich (St. Louis, MO, USA)                  |
| L-ascorbic acid-2-phosphate                                                    | L-AA                                     | A8960-5G    | Sigma-Aldrich (St. Louis, MO, USA)                  |
| Dexamethasone                                                                  | DX                                       | D4902-500G  | Sigma-Aldrich (St. Louis, MO, USA)                  |
| <b>Cell culture medium and component</b>                                       |                                          |             |                                                     |
| Essential 8 medium                                                             | E8                                       | A1517001    | Thermo Fisher Scientific Inc. (Waltham, MA, USA)    |
| Essential 6 medium                                                             | E6                                       | A1516401    | Thermo Fisher Scientific Inc. (Waltham, MA, USA)    |
| DMEM/F12 medium                                                                | DMEM/F12                                 | 11330-057   | Thermo Fisher Scientific Inc. (Waltham, MA, USA)    |
| α-MEM                                                                          | α-MEM                                    | 12000022    | Thermo Fisher Scientific Inc. (Waltham, MA, USA)    |
| DMEM                                                                           | DMEM                                     | D5648       | Sigma-Aldrich (St. Louis, MO, USA)                  |
| Fetal bovine serum                                                             | FBS                                      | PSRPS-FB2   | Biological Industries (Kibbutz Beit-Haemek, Israel) |
| <b>Antibodies</b>                                                              |                                          |             |                                                     |
| Mouse Anti-GFAP antibody                                                       | Anti-GFAP antibody                       | MA5-15086   | Thermo Fisher Scientific Inc. (Waltham, MA, USA)    |
| Mouse Anti-AFP antibody                                                        | Anti-AFP antibody                        | PA5-21004   | Thermo Fisher Scientific Inc. (Waltham, MA, USA)    |
| Rabbit Anti-SMA antibody                                                       | Anti-SMA antibody                        | PA5-19465   | Thermo Fisher Scientific Inc. (Waltham, MA, USA)    |
| Alexa Fluor® 488 Goat Anti-Rabbit IgG (H+L) Antibody                           | 488 Anti-Rabbit IgG Antibody             | A11008      | Thermo Fisher Scientific Inc. (Waltham, MA, USA)    |
| Alexa Fluor® 594 Donkey Anti-Mouse IgG (H+L) Antibody                          | 594 Donkey Anti-Mouse IgG (H+L) Antibody | A21203      | Thermo Fisher Scientific Inc. (Waltham, MA, USA)    |
| FITC Mouse Anti-Human CD34                                                     | Anti-CD34 antibody                       | 555821      | BD Pharmingen (Franklin Lakes, NJ, USA)             |
| FITC Mouse IgG1                                                                | Anti-CD34 isotype antibody               | 555748      | BD Pharmingen (Franklin Lakes, NJ, USA)             |
| FITC Mouse Anti-Human CD44                                                     | Anti-CD44 antibody                       | 555478      | BD Pharmingen (Franklin Lakes, NJ, USA)             |
| FITC Mouse IgG2b                                                               | Anti-CD44 isotype antibody               | 555742      | BD Pharmingen (Franklin Lakes, NJ, USA)             |
| PE Mouse Anti-Human CD73                                                       | Anti-CD73 antibody                       | 550257      | BD Pharmingen (Franklin Lakes, NJ, USA)             |
| PE Mouse Anti-Human CD105                                                      | Anti-CD105 antibody                      | A07414      | Beckman Coulter (Brea, CA, USA)                     |
| PE Mouse IgG3 RPE                                                              | Anti-CD105 isotype antibody              | 0105-09     | SoutherBiotech (Birmingham, AL, USA)                |

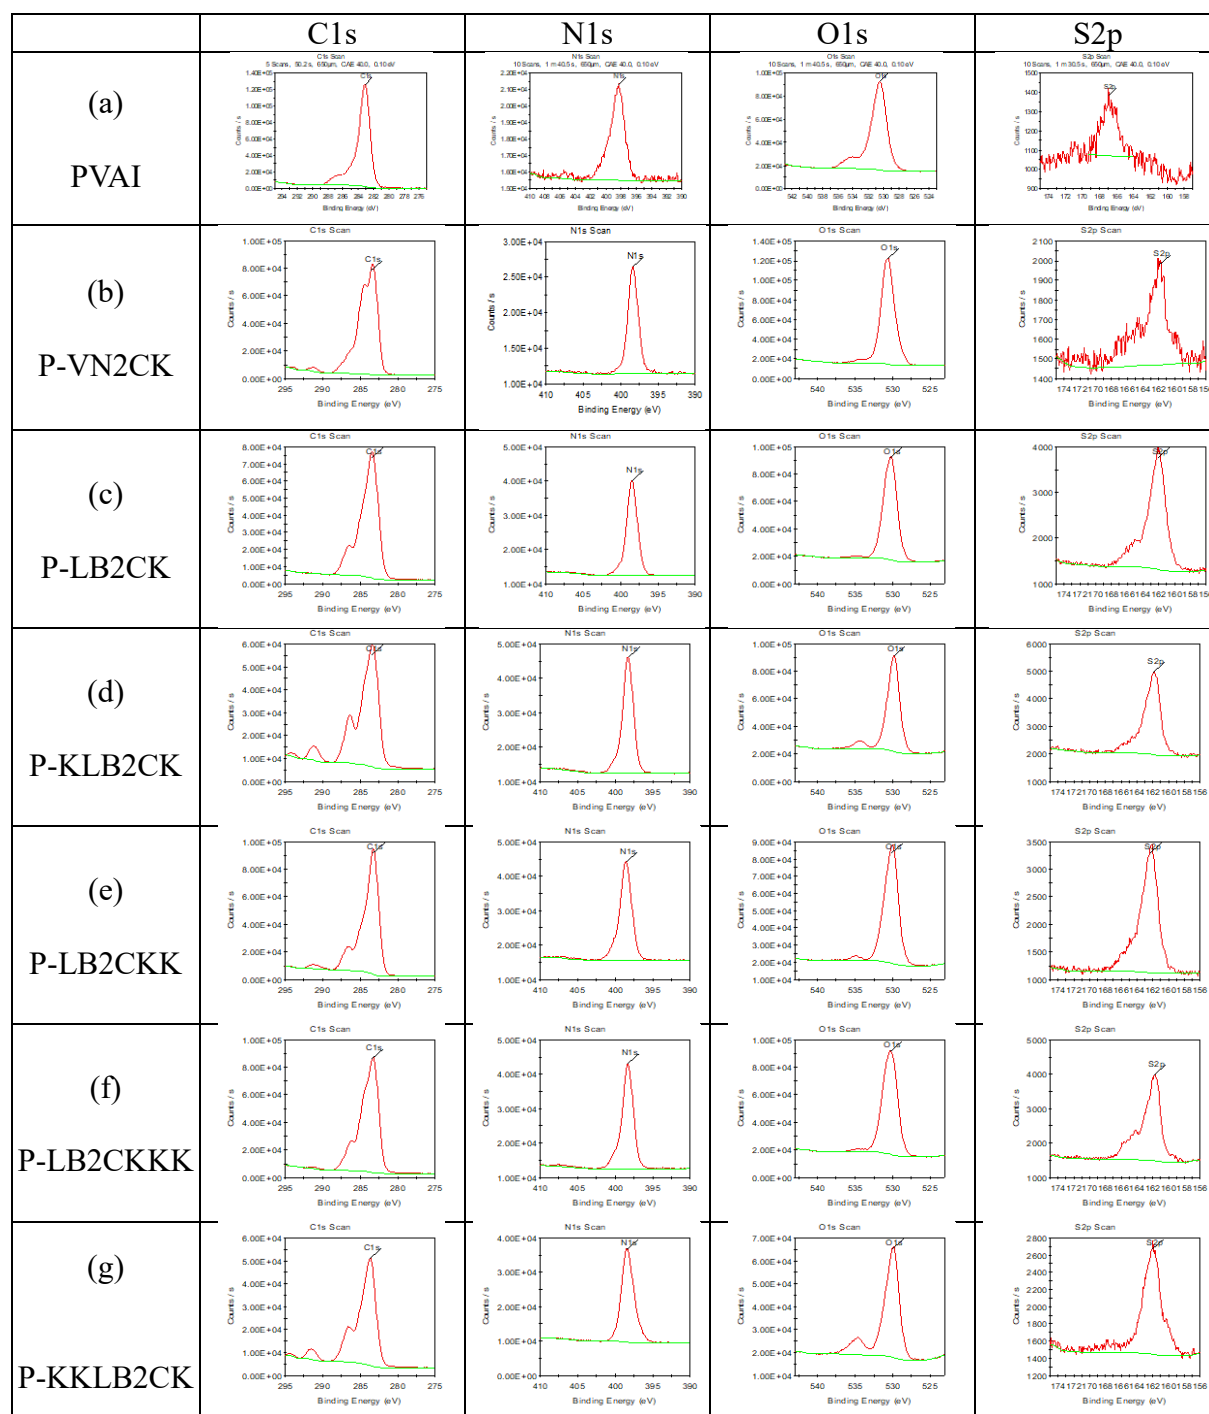

**Supplementary Fig. 1** Surface analysis of PVAI hydrogels conjugated with designed peptides by XPS. High-resolution spectra of the C 1s, N 1s, O 1s and S 2p peaks of the surfaces of the PVAI (a), P-VN2CK (b), P-LB2CK (c), P-KLB2CK (d), P-LB2CKK (e), P-LB2CKKK (f) and P-KKLB2CK (g) hydrogels.

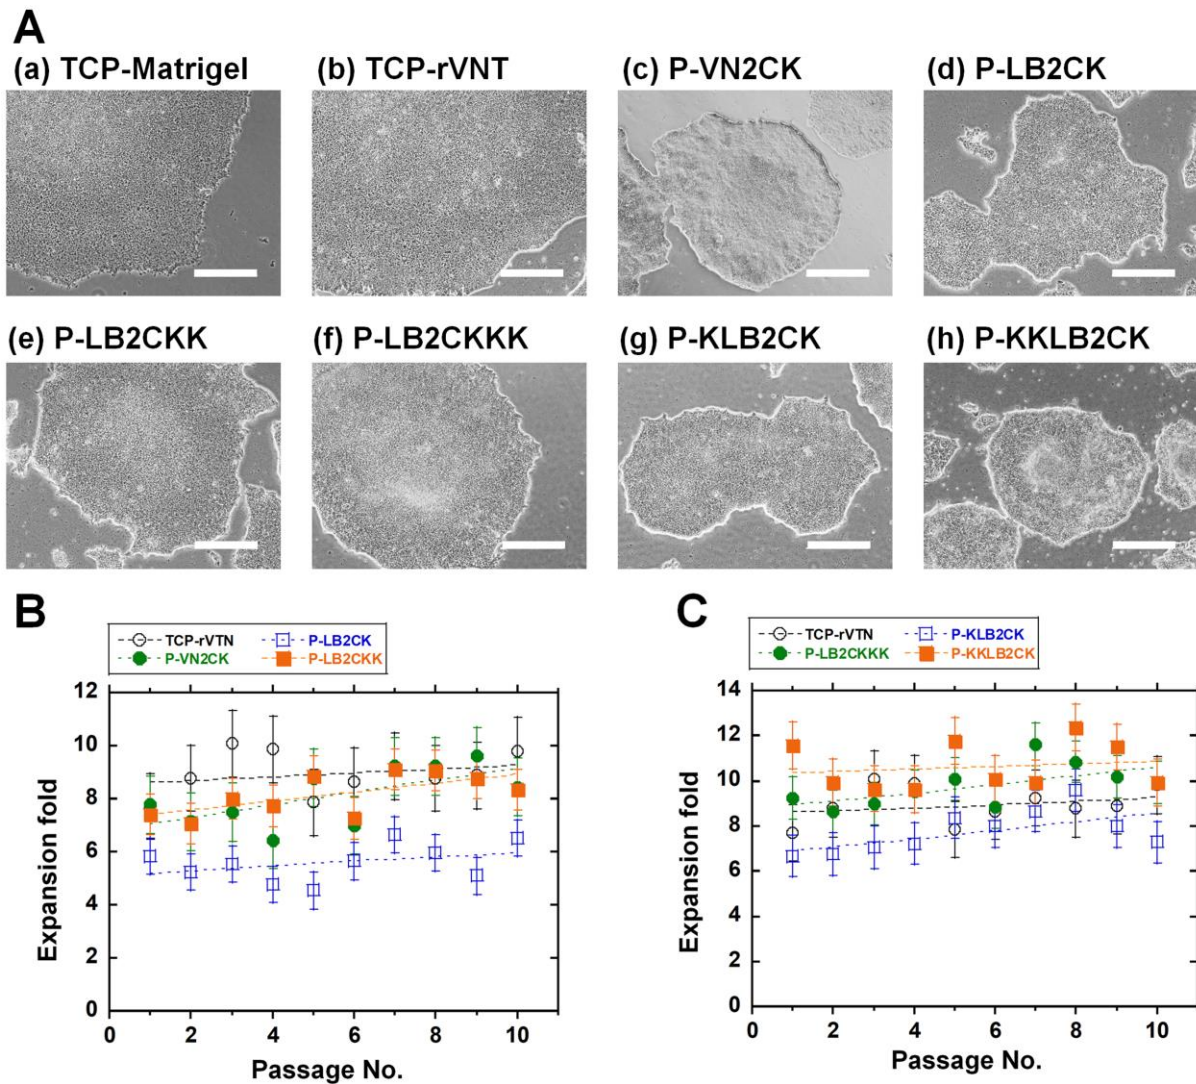

**Supplementary Fig. 2.** hiPSC (HPS0077) cultivation on PVAI hydrogels conjugated with designed peptides under xeno-free culture conditions. (A) Morphologies of hiPSCs cells on Matrigel-coated TCP (TCP-Matrigel) plates (a), rVNT-coated TCP (TCP-rVNT) plates (b), P-VN2CK hydrogels (c), P-LB2CK hydrogels (d), P-LB2CKK hydrogels (e), P-LB2CKKK hydrogels (f), P-KLB2CK hydrogels (g), and P-KKLB2CK hydrogels (h) at passage 10. The scale bar is 500  $\mu$ m. (B) Passage number dependence of the expansion fold of hiPSCs on TCP-rVNT plates and PVAI hydrogels conjugated with designed peptides (P-VN2CK, P-LB2CK and P-LB2CKK). (C) Passage number dependence of the expansion fold of hiPSCs on TCP-rVNT plates and PVAI hydrogels conjugated with designed peptides (P-LB2CKKK, P-KLB2CK and P-KKLB2CK).

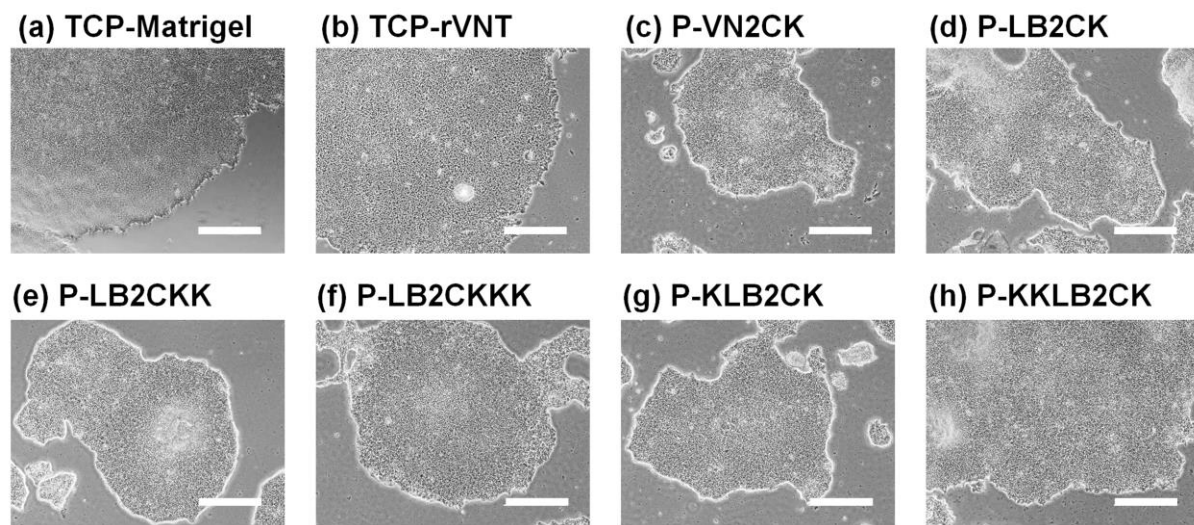

**Supplementary Fig. 3.** hESC (H9) cultivation on PVAI hydrogels conjugated with designed peptides under xeno-free culture conditions. Morphologies of hESCs cells on Matrigel-coated TCP (TCP-Matrigel) plates (a), rVNT-coated TCP (TCP-rVNT) plates (b), P-VN2CK hydrogels (c), P-LB2CK hydrogels (d), P-LB2CKK hydrogels (e), P-LB2CKKK hydrogels (f), P-KLB2CK hydrogels (g), and P-KKLB2CK hydrogels (h) at passage 10. The scale bar is 500 μm.



**A**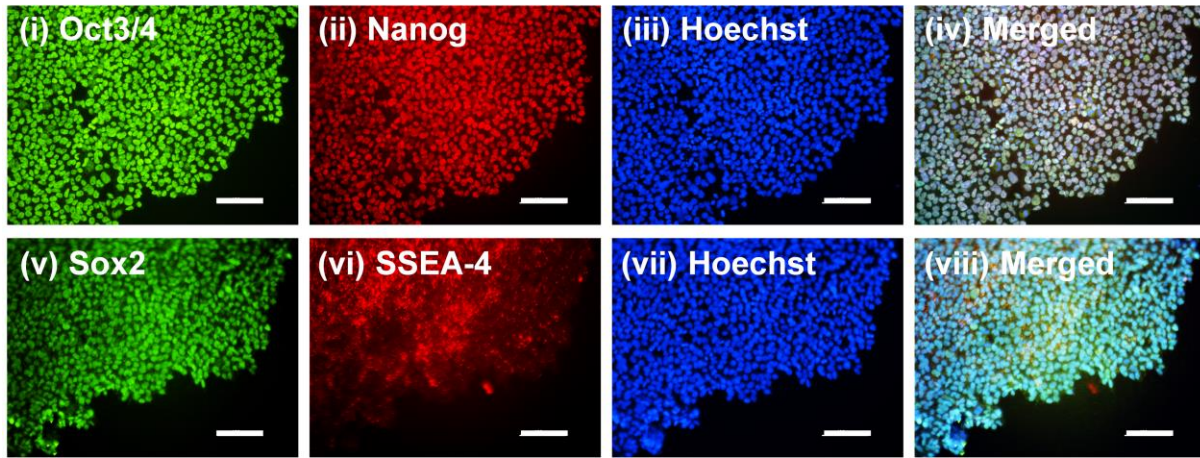**B**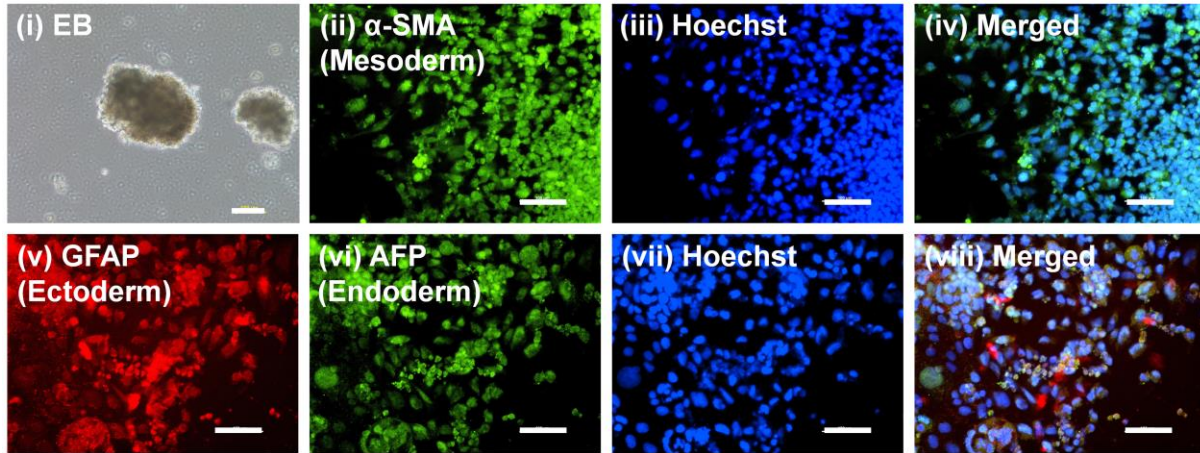

**Supplementary Fig. 4.** Pluripotency and *in vitro* differentiation ability of hiPSCs (HPS0077) after long-term (passage ten) cultivation on P-LB2CKKK hydrogels using xeno-free cultivation protocols. (A) Pluripotency protein expression of Oct3/4 (i, green), Nanog (ii, red), Sox2 (v, green), and SSEA-4 (vi, red) in hiPSCs (HPS0077) analyzed using immunostaining with nuclear staining by Hoechst 33342 (blue, iii, vii) after hiPSC culture on P-LB2CKKK hydrogels using xeno-free cultivation protocols for ten passages. The images (iv) and (viii) were generated by merging (i)–(iii) and (v)–(vii), respectively. The scale bar is 100  $\mu$ m. (B) (i) Morphology of EB cells differentiated from hiPSCs (HPS0077) after hiPSC culture on P-LB2CKKK hydrogels using xeno-free cultivation protocols for ten passages. Expression of a mesodermal marker protein (ii,  $\alpha$ -SMA, green), an ectodermal marker protein (v, GFAP, red) and an endodermal marker protein (vi, AFP, green) from EB cells evaluated using immunostaining with nuclear staining from Hoechst 33342 (iii, vii, blue) after hiPSC culture on P-LB2CKKK hydrogels using xeno-free cultivation protocols for ten passages. The photos (iv) and (viii) were generated by merging (ii)–(iii) and (v)–(vii), respectively. The scale bar is 100  $\mu$ m.

**A**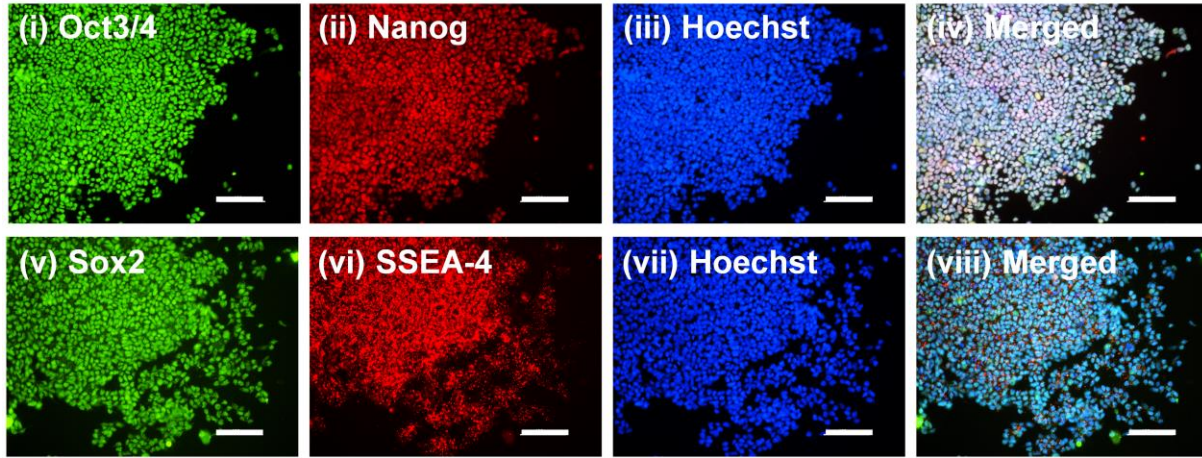**B**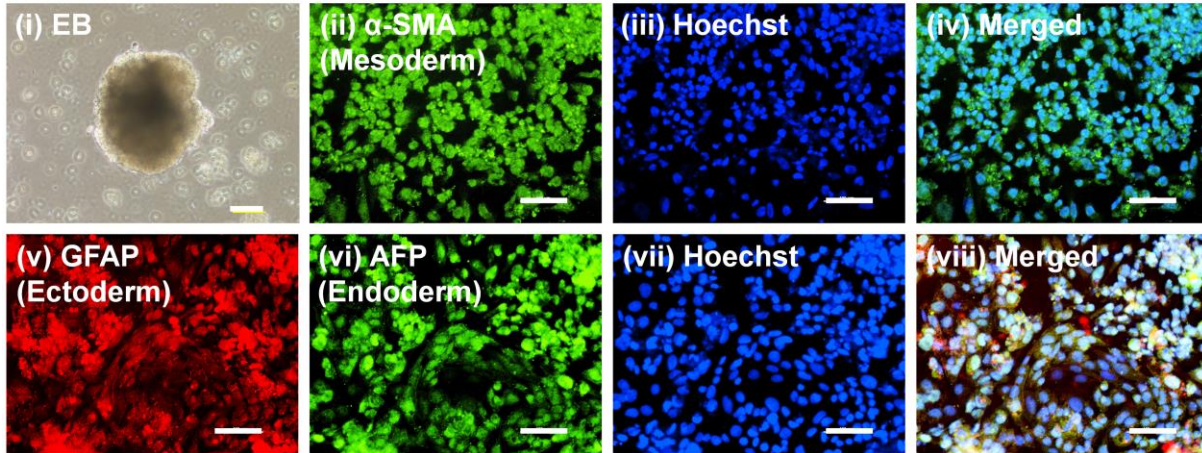

**Supplementary Fig. 5.** Pluripotency and *in vitro* differentiation ability of hiPSCs (H-M5) after long-term (passage ten) cultivation on P-KKLB2CK hydrogels using xeno-free cultivation protocols. (A) Pluripotency protein expression of Oct3/4 (i, green), Nanog (ii, red), Sox2 (v, green), and SSEA-4 (vi, red) in hiPSCs (H-M5) analyzed using immunostaining with nuclear staining by Hoechst 33342 (blue, iii, vii) after hiPSC culture on P-KKLB2CK hydrogels using xeno-free cultivation protocols for ten passages. The images (iv) and (viii) were generated by merging (i)–(iii) and (v)–(vii), respectively. The scale bar is 100  $\mu$ m. (B) (i) Morphology of EB cells differentiated from hiPSCs (H-M5) after hiPSC culture on P-KKLB2CK hydrogels using xeno-free cultivation protocols for ten passages. Expression of a mesodermal marker protein (ii,  $\alpha$ -SMA, green), an ectodermal marker protein (v, GFAP, red) and an endodermal marker protein (vi, AFP, green) from EB cells evaluated using immunostaining with nuclear staining from Hoechst 33342 (iii, vii, blue) after hiPSC culture on P-KKLB2CK hydrogels using xeno-free cultivation protocols for ten passages. The photos (iv) and (viii) were generated by merging (ii)–(iii) and (v)–(vii), respectively. The scale bar is 100  $\mu$ m.



**A**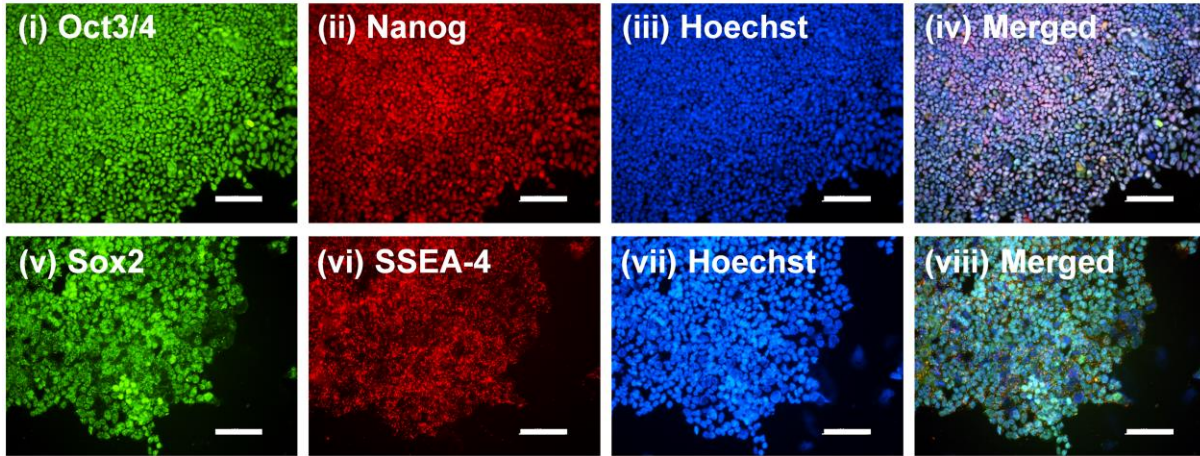**B**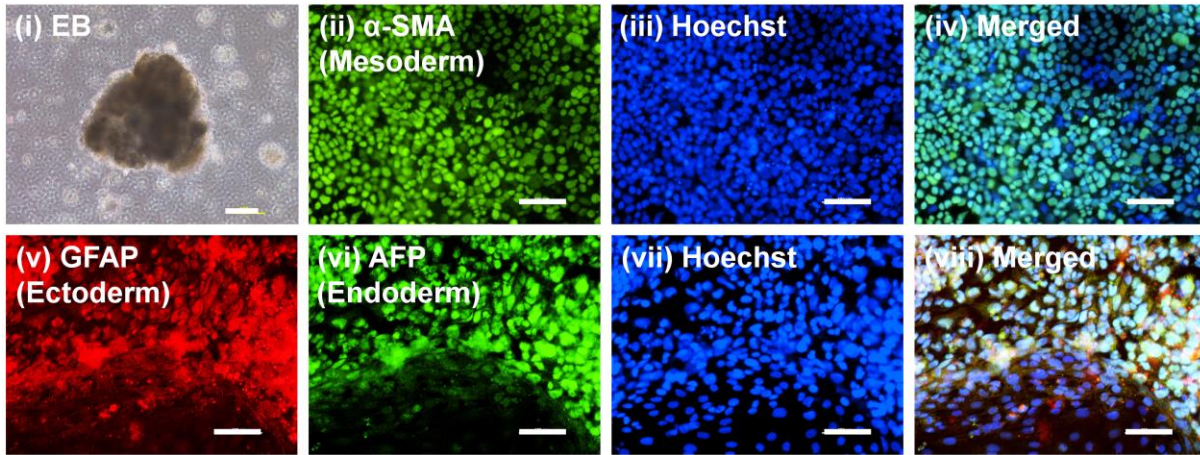

**Supplementary Fig. 6.** Pluripotency and *in vitro* differentiation ability of hiPSCs (H-M5) after long-term (passage ten) cultivation on P-LB2CKKK hydrogels using xeno-free cultivation protocols. (A) Pluripotency protein expression of Oct3/4 (i, green), Nanog (ii, red), Sox2 (v, green), and SSEA-4 (vi, red) in hiPSCs (H-M5) analyzed using immunostaining with nuclear staining by Hoechst 33342 (blue, iii, vii) after hiPSC culture on P-LB2CKKK hydrogels using xeno-free cultivation protocols for ten passages. The images (iv) and (viii) were generated by merging (i)–(iii) and (v)–(vii), respectively. The scale bar is 100  $\mu$ m. (B) (i) Morphology of EB cells differentiated from hiPSCs (H-M5) after hiPSC culture on P-LB2CKKK hydrogels using xeno-free cultivation protocols for ten passages. Expression of a mesodermal marker protein (ii,  $\alpha$ -SMA, green), an ectodermal marker protein (v, GFAP, red) and an endodermal marker protein (vi, AFP, green) from EB cells evaluated using immunostaining with nuclear staining from Hoechst 33342 (iii, vii, blue) after hiPSC culture on P-LB2CKKK hydrogels using xeno-free cultivation protocols for ten passages. The photos (iv) and (viii) were generated by merging (ii)–(iii) and (v)–(vii), respectively. The scale bar is 100  $\mu$ m.



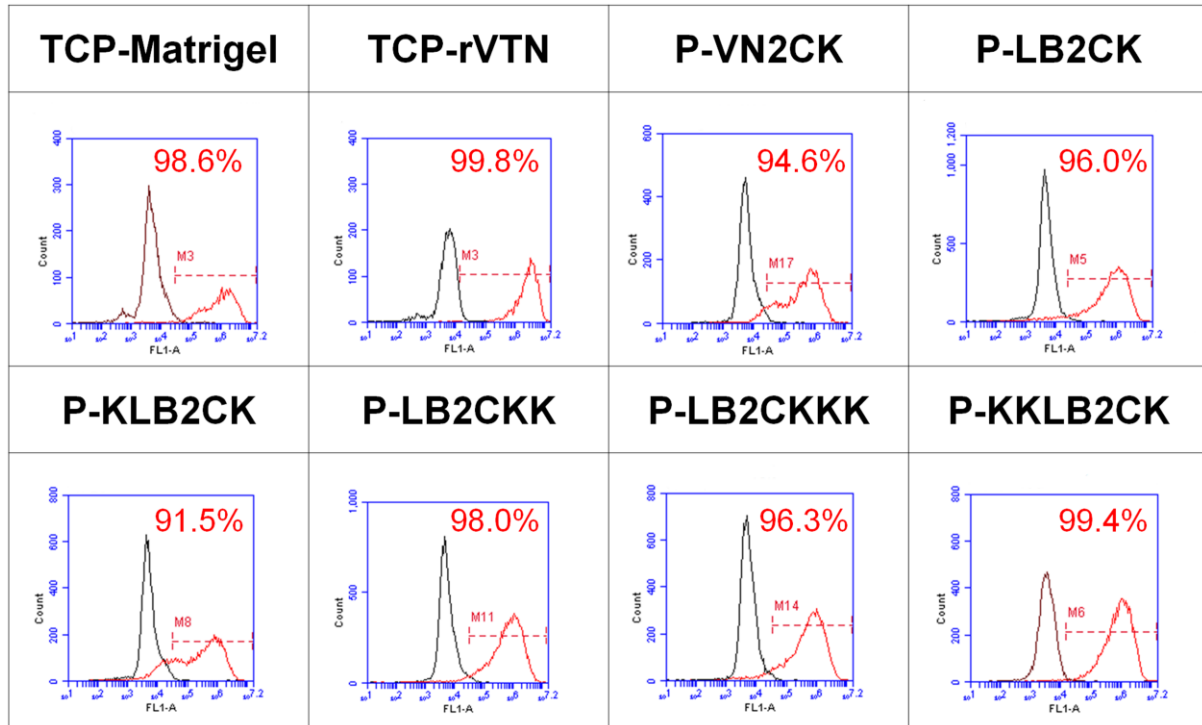

**Supplementary Fig. 7.** Pluripotent marker expression of SSEA-4 by hiPSCs (HPS0077) after culture on TCP-Matrigel dishes, TCP-rVTN dishes and each PVAI hydrogel conjugated with designed peptides for 10 passages under xeno-free cultivation conditions, which was evaluated using flow cytometry.
